# Supplementary material for: Development of an online citrate/Ca2+sensing system for dialysis
Source: Royal Society of Chemistry journal article supplement (doi:10.1039/c0an00647e), 2010-10-20
Supplement: c0an00647e.pdf [file c0an00647e.pdf]

## Development of an online citrate/Ca<sup>2+</sup> sensing system for dialysis

Youjun Yang<sup>a</sup>, Balazs Szamosfalvi<sup>b</sup>, Jerry Yee<sup>b</sup>, Stanley Frinak<sup>b</sup>, Eric V. Anslyn<sup>\*a</sup>

<sup>a</sup> Department of Chemistry and Biochemistry, University of Texas at Austin, 1 University Station A5300, Austin, TX 78712, USA

<sup>b</sup> Division of Nephrology, Henry Ford Hospital, Detroit, MI, 48202, USA

The codes to drive the SIA instrument.

| Command                                       | Description                                                                                                                           |
|-----------------------------------------------|---------------------------------------------------------------------------------------------------------------------------------------|
| Loop Start (#) n                              | Start of the analysis and repeat “n” times                                                                                            |
| Loop Start (#) 3                              |                                                                                                                                       |
| Syringe Pump Valve In                         |                                                                                                                                       |
| Syringe Pump Flowrate (microliter/sec)<br>300 |                                                                                                                                       |
| Syringe Pump Aspirate (microliter) <b>800</b> |                                                                                                                                       |
| Syringe Pump Delay Until Done                 | Rinse the system three times with 800 uL of citrate sensing solution each time.                                                       |
| Syringe Pump Valve Out                        |                                                                                                                                       |
| Multiposition Valve port 7                    | Note: The “port 7” is the port to the flowcell.                                                                                       |
| Syringe Pump Flowrate (microliter/sec)<br>300 |                                                                                                                                       |
| Syringe Pump Empty                            |                                                                                                                                       |
| Syringe Pump Delay Until Done                 |                                                                                                                                       |
| Loop End                                      |                                                                                                                                       |
| Syringe Pump Valve In                         |                                                                                                                                       |
| Syringe Pump Flowrate (microliter/sec)<br>300 |                                                                                                                                       |
| Syringe Pump Aspirate (microliter) <b>300</b> |                                                                                                                                       |
| Syringe Pump Delay Until Done                 |                                                                                                                                       |
| Syringe Pump Valve Out                        |                                                                                                                                       |
| Multiposition Valve <b>sample</b>             |                                                                                                                                       |
| Syringe Pump Flowrate (microliter/sec)<br>50  | Aspirate 300 uL citrate sensing solution, 12 uL of Ca <sup>2+</sup> sensing solution and 13 uL of dialysate sample into the flowcell. |
| Syringe Pump Aspirate (microliter) <b>12</b>  |                                                                                                                                       |
| Syringe Pump Delay Until Done                 |                                                                                                                                       |
| Multiposition Valve <b>ReagentB</b>           | Note: The “sample” is the port to dialysate sampleing loop. The “reagentB” is the port to Ca <sup>2+</sup> sensing stock solution.    |
| Syringe Pump Flowrate (microliter/sec)<br>50  |                                                                                                                                       |
| Syringe Pump Aspirate (microliter) <b>13</b>  |                                                                                                                                       |
| Syringe Pump Delay Until Done                 |                                                                                                                                       |
| Multiposition Valve port 7                    |                                                                                                                                       |
| Syringe Pump Flowrate (microliter/sec)<br>300 |                                                                                                                                       |
| Syringe Pump Empty                            |                                                                                                                                       |
| Syringe Pump Delay Until Done                 |                                                                                                                                       |
| Delay (sec) 300                               | Wait for 300s before collection of the absorption spectrum to allow the reactions to reach completion or equilibrium.                 |
| Loop End                                      | End of a sensing cycle.                                                                                                               |
